# Supplementary material
Source: PubMed Central journal article supplement (PMC10640704)
Supplement: jama-e2323651-s002.pdf [file jama-e2323651-s002.pdf]

## Data Sharing Statement

### Data

**Data available:** Yes

**Data types:** Deidentified participant data, Data dictionary

**How to access data:** Deidentified participant data and a data dictionary available will be made available through the CARDIA study according to CARDIA and NHLBI policies for data sharing.

**When available:** beginning date: 08-31-2025

### Supporting Documents

**Document types:** None

### Additional Information

**Who can access the data:** The data will be made available to researchers whose proposed use of the data has been approved.

**Types of analyses:** Data will be made available for analyses proposing new hypotheses or analyses not otherwise pre-specified by the the original investigators.

**Mechanisms of data availability:** Data will be made available in accordance with CARDIA policies, which included, but are not limited to an approved proposal and signed data access/use agreement.
